# Supplementary material for: A novel strategy to synthesize well-defined PS brushes on silica particles by combination of lithium–iodine exchange (LIE) and surface-initiated living anionic polymerization (SI-LAP)
Source: Royal Society of Chemistry journal article supplement (doi:10.1039/c5cc00335k), 2015-01-01
Supplement: c5cc00335k1.pdf [file c5cc00335k1.pdf]

Supporting Information for:

**A new strategy to synthesize well-defined PS brushes on silica particles by combination of lithium-iodine exchange (LIE) and surface-initiated living anionic polymerization (SI-LAP)**

**Jiakang Min,<sup>a,b</sup> Yichao Lin,<sup>a,b</sup> Jun Zheng<sup>\*a</sup> and Tao Tang<sup>\*a</sup>**

**Contents:**

|                                                                                                                                                                                                                      |   |
|----------------------------------------------------------------------------------------------------------------------------------------------------------------------------------------------------------------------|---|
| Experimental section.....                                                                                                                                                                                            | 1 |
| Characterization.....                                                                                                                                                                                                | 3 |
| Figure S1. TGA curves: A-SiO <sub>2</sub> , B-SiO <sub>2</sub> @ITS-12h, (C, D, E, F)-SiO <sub>2</sub> @ITS-12h@PSs hybrid particles.....                                                                            | 4 |
| Figure S2. Number-average molecular weights ( <i>M<sub>n</sub></i> ) of grafted PS brushes of (a) SiO <sub>2</sub> @ITS-12h@PSs, (b) SiO <sub>2</sub> @ITS-24h@PSs as a function of anionic polymerization time..... | 4 |
| Figure S3. TEM images of ultracryotomy: PS composite films containing raw SiPs.....                                                                                                                                  | 5 |
| Figure S4. SEC-MALLS curves of grafted PS brushes of ITS-12h@PSs.....                                                                                                                                                | 5 |
| Figure S5. HRTEM images of hybrid particles: (a) SiO <sub>2</sub> @ITS-12h@PS-8h, (b) SiO <sub>2</sub> @ITS-12h@PS-24h, (c) SiO <sub>2</sub> @ITS-24h@PS-16h, (d) SiO <sub>2</sub> @ITS-24h@PS-24h.....              | 6 |
| References.....                                                                                                                                                                                                      | 6 |

**Experimental section**

**Materials.** Styrene (99%), ethanol (99%), ammonium hydroxide solution (28% NH<sub>3</sub>), hydrofluoric acid (HF, 40%), tetraethoxysilane (TEOS, 99.9%), acetone, toluene, *n*-hexane, isopropanol, sodium iodide (NaI), diethyl ether and cyclohexane were purchased from China National Medicines Corporation Ltd. 3-Chloropropyltrimethoxysilane (CTS, 94%) was purchased from Aldrich. *tert*-Butyllithium (*tert*-BuLi, 1.6M in pentane) was purchased from Alfa Aesar. Styrene, TEOS, acetone, isopropanol and diethyl ether were dried over CaH<sub>2</sub> or NaH and distilled under reduced pressure prior to use. Toluene, *n*-hexane and cyclohexane were purified by a Braun system. All other reagents were used as received.

**Synthesis of 3-Iodopropyltrimethoxysilane (ITS).** ITS was prepared by incorporating dry sodium iodide (NaI) into commercially-available 3-chloropropyltrimethoxysilane (CTS, 94%, <sup>1</sup>H NMR (CDCl<sub>3</sub>) of CTS: δ 3.65-3.55 (-OCH<sub>3</sub>), 3.54-3.48 (-CH<sub>2</sub>Cl), 1.9-1.8 (-CH<sub>2</sub>), 0.8-0.7 (-Si-CH<sub>3</sub>)) as previously reported.<sup>1</sup> The synthesis process was as follows: NaI (4.5 g, 30 mmol) and CTS (4.3 g, 20 mmol) were added to acetone (50 ml) and refluxed for 48 h at 50 °C under nitrogen. Subsequently, the solution was filtered and distilled under reduced pressure to get the

product (ITS).  $^1\text{H}$  NMR ( $\text{CDCl}_3$ ) of ITS:  $\delta$  3.65-3.55 (-OCH<sub>3</sub>), 3.24-3.12 (-CH<sub>2</sub>I), 1.9-1.8 (-CH<sub>2</sub>), 0.8-0.7 (-Si-CH<sub>2</sub>).

**Synthesis and Chemical Modification of Silica Particles.** The silica particles (SiPs) were synthesized by hydrolysis of TEOS with ammonia in a mixed solvent of ethanol and ultrapure water, according to the typical sol-gel method.<sup>2</sup> Ultrapure water (50 ml) and ethanol (200 ml) were added into a single-necked round-bottom flask (500 ml) equipped with a magnetic agitator and heated to 30 °C. TEOS (5 ml) was added into the solution under magnetic stirring at a speed of 300 rpm. Ammonia (5 ml) was dropwise added after 10 min to the flask while stirring. Subsequently, the mixture was stirred at a speed of 500 rpm for 6 h, purified by centrifugation and redispersion three times using ethanol to get the SiPs powders with a mean diameter of 200 nm ultimately. The powders were stored in a vacuum drying oven at 60 °C.

The above-obtained SiPs powders (3 g) were redispersed in 50 ml of fresh anhydrous toluene while stirring. 5 ml ITS were quickly injected into the solution at 60 °C for 1 h, and then stirred under dry nitrogen at 110 °C for 12 h and cooled to room temperature.<sup>3</sup> The resultant ITS-modified silica particles ( $\text{SiO}_2\text{@ITS}$ -12h) were separated by centrifugation and redispersion three times with toluene to remove the excess ITS. The above operation was repeated again with reaction time of 24 h to obtain the  $\text{SiO}_2\text{@ITS}$ -24h. The iodine-functionalized silica particles ( $\text{SiO}_2\text{@ITS}$ s) were finally stored in a vacuum drying oven at 80 °C.

**Lithium-Iodine Exchange (LIE) and Surface-Initiated Living Anionic Polymerization (SI-LAP) of PS from  $\text{SiO}_2\text{@ITS}$ .** Both the LIE and SI-LAP procedure were conducted under an atmosphere of dry, deoxygenated nitrogen. At the first step,  $\text{SiO}_2\text{@ITS}$ s (2 g) was added to a mixed solvent of *n*-hexane (18 ml) and diethyl ether (2 ml) by stirring for 2 h at -78 °C. Then the reaction of LIE was conducted by adding 2.1-2.2 molar equivalent (relative to Si-I groups) of commercial tert-butyllithium (*tert*-BuLi, 1.6 M) to the mixture, stirred at a speed of 800 rpm for 6 h when the temperature was stable. At last, the mixture was warmed to room temperature and kept for 2 h to remove the residual *tert*-BuLi which was consumed by rapid proton abstraction from diethyl ether<sup>4</sup> after the reaction was finished.

The above-obtained suspension (after clearing the supernate) was divided into four parts and added into cyclohexane (100 ml) separately, preparing for anionic polymerization. The SI-LAP was started by adding designed amount of styrene monomer to each reaction system quickly to react for 8 h, 16 h, 24 h and 32 h, respectively. The SI-LAP was quenched by trace amounts of isopropanol at the end. The hybrid particles were purified by centrifugation/redispersion three times using toluene, dried at 60 °C under a vacuum to generate eight

hybrid particles ( $\text{SiO}_2@\text{PSs}$ ) samples with various PS brushes. The resultant products were nominated as  $\text{SiO}_2@\text{ITS-xh}@\text{PS-yh}$ , here “x” is the reaction time between SiPs and ITS, and “y” is the polymerization time of styrene. For example,  $\text{SiO}_2@\text{ITS-24h}@\text{PS-16h}$  means the product synthesized by modified SiPs through the reaction with ITS for 24 h, following by LIE and the polymerization of styrene for 16 h.

**Cleavage of  $\text{SiO}_2@\text{PSs}$  hybrid particles.** All the  $\text{SiO}_2@\text{PSs}$  hybrid particles (8.91 g) were put into an aqueous HF solution with 5 vol% HF (a mixed solution of hydrofluoric acid (HF, 10 ml) with ultrapure water (70 ml)) to perform the cleavage of grafted PS brushes. The mixtures were stirred for 4 h at room temperature. The cleaved polymer brushes were obtained through filtration by using an 0.2  $\mu\text{m}$  syringe filter and then dried in the air.

**Preparation of PS Film Composites Containing  $\text{SiO}_2@\text{PS}$  Hybrid Particles.** The raw SiPs (0.263 g) and  $\text{SiO}_2@\text{ITS-24h}@\text{PS-32h}$  hybrid particles (0.375 g, the content of PS brush accounts for 28.3 wt %) were implanted in 5 g PS matrixes by dissolving in toluene at room temperature. After stirring well, the mixtures were sonicated for 1 h, cast onto three watch-glass plates, dried in air and dried in a vacuum oven at 80 °C for 24 h to get rid of residual solvents, respectively. At last, the relative smooth and flat films of uniform thickness (1 mm) were cured by hot-pressing at 180 °C for 10 min.

## Characterization

**Transmission Electron Microscope (TEM).** TEM observations were conducted on a JEM-1011 transmission electron microscope at an acceleration voltage of 100 kV. Ultrathin sections were cut using a Leica Ultracut and a glass knife at room temperature. The samples were collected on carbon-coated copper TEM grids.

**High-Resolution Transmission Electron Microscope (HRTEM).** HRTEM observations were done on a FEI Tecnai G2 S-Twin transmission electron microscope operating at 200 kV.

**Nuclear Magnetic Resonance (NMR) Spectra.**  $^1\text{H}$  NMR spectra were performed on a Bruker AV400 MHz spectrometer using  $\text{CDCl}_3$  as the solvent.

**X-ray Photoelectron Spectroscopy (XPS).** XPS was carried out on a VG ESCALAB MK II spectrometer using an Al K $\alpha$  exciting radiation from an X-ray source operated at 10.0 kV and 10 mA.

**Thermal Gravimetric Analysis (TGA).** TGA was performed on an SDTQ600 (TA Instruments) in the range from room temperature to 800 °C under air flow at a heating rate of 10 °C /min.

**SEC-MALLS.** Weight-average molecular weights ( $M_w$ ) and polydispersity indices (PDI) were measured by size exclusion chromatography (SEC). The SEC-MALLS consisted of a Model 1500 Digital HPLC pump, a DAWN

HELEOS II (Wyatt multi-angle LS detector, GaAs 662.0 nm), an Optilab T-rEX (Wyatt RI detector, LED light 658.0 nm) and a viscosity detector (ViscoStar, Wyatt Technology). This instrument had a protected MZ-Gel SD *plus* 50×0.8 mm column (10<sup>2</sup>Å pore size) and two MZ-Gel SD *plus* 300×8.0 mm columns (10<sup>3</sup> and 10<sup>5</sup>Å pore size). For all SEC analyses, HPLC grade tetrahydrofuran was used as the mobile phase at 25 °C (flow rate: 1mL min<sup>-1</sup>). The increments (dn/dc) of samples were measured based on the calibration constant of the RI detector and the concentration of samples. Data acquisition was performed using Wyatt Technology WinAstra6 software.

**Graft Density Calculations ( $D_s$ ).** The graft density ( $D_s$ , chains/nm<sup>2</sup>) of PS brushes may be calculated according to eq 1 from the molecular weight ( $M_n$ , g/mol), graft amount ( $W$ ), surface area ( $S$ ), and Avogadro's number ( $N_a$ , molecules/mol).

$$D_s = (W / N_a) / (M_n / S) \quad \text{eq (1)}$$

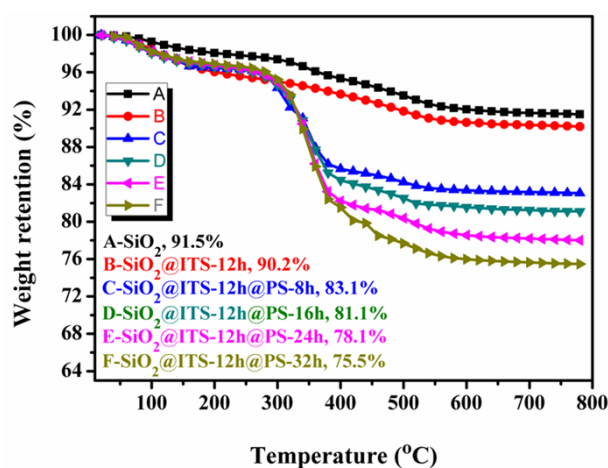

Figure S1. TGA curves: A-SiO<sub>2</sub>, B-SiO<sub>2</sub>@ITS-12h, (C, D, E, F)-SiO<sub>2</sub>@ITS-12h@PSs hybrid particles.

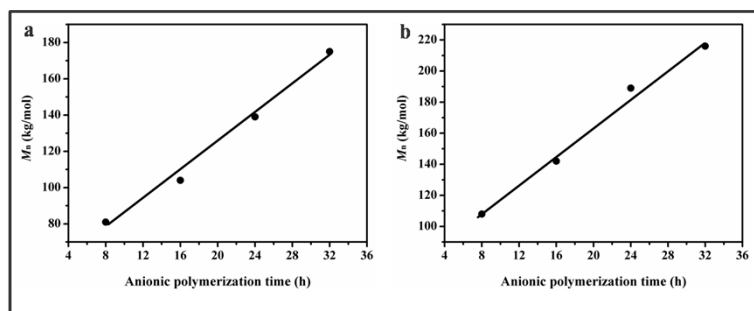

Figure S2. Number-average molecular weights ( $M_n$ ) of grafted PS brushes of (a) SiO<sub>2</sub>@ITS-12h@PSs, (b) SiO<sub>2</sub>@ITS-24h@PSs as a function of anionic polymerization time.

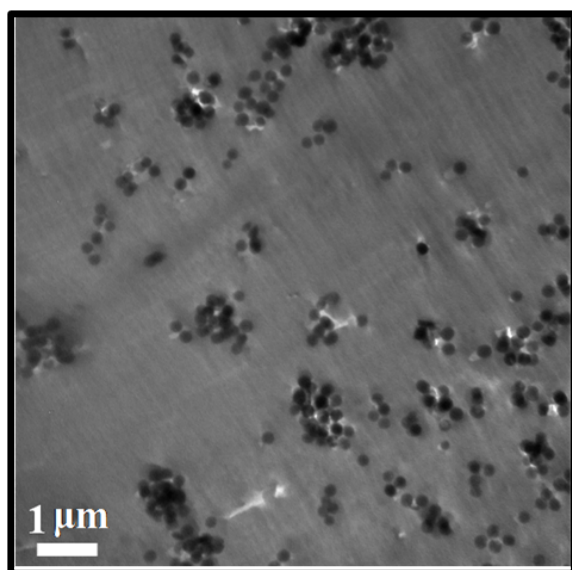

Figure S3. TEM images of PS/SiPs composite containing 5 wt% raw SiPs.

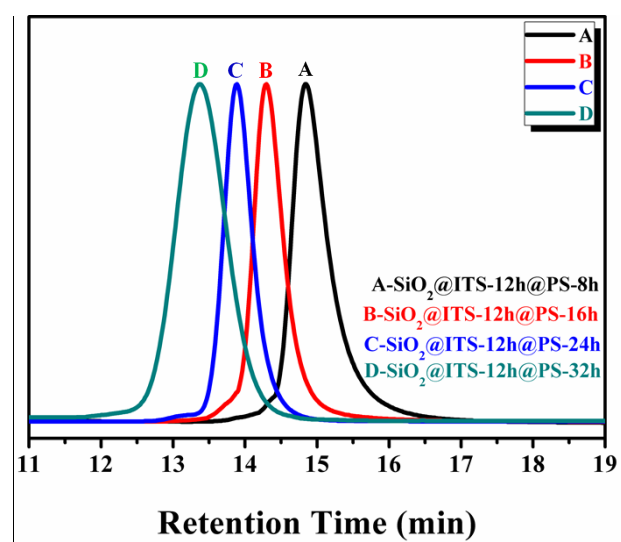

Figure S4. SEC-MALLS curves of grafted PS brushes of SiO<sub>2</sub>@ITS-12h@PSs.

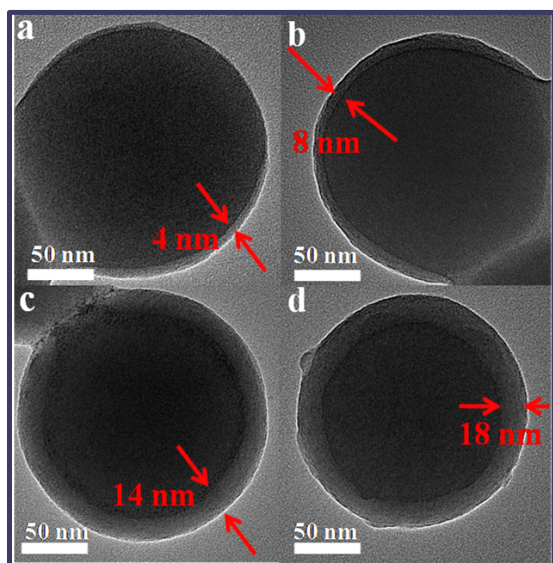

Figure S5. HRTEM images of hybrid particles: (a)  $\text{SiO}_2\text{@ITS-12h@PS-8h}$ , (b)  $\text{SiO}_2\text{@ITS-12h@PS-24h}$ , (c)  $\text{SiO}_2\text{@ITS-24h@PS-16h}$ , (d)  $\text{SiO}_2\text{@ITS-24h@PS-24h}$ .

#### References:

- 1 B.L. Booth, G.C. Ofunne, C. Stacey, P.J.T. Tait, J. Org. Chem., **1986**, 315, 143.
- 2 W. Stöber, A. Fink, Bohn, A. J. Colloid Interface Sci., **1968**, 26, 62.
- 3 M. Wählander, F. Nilsson, E. Larsson, W. Tsai, H. Hillborg, A. Carlmark, U. W. Gedde, E. Malmström, Polymer, 2014, 55, 2125.
- 4 T. F. Bates, M. T. Clarke, R. D. Thomas, J. Am. Chem. Soc., 1988, 110, 5109.
